# Supplementary material for: Structures of cationic and anionic polyelectrolytes in aqueous solutions: the sign effect
Source: Royal Society of Chemistry journal article supplement (doi:10.1039/d1sm01700d), 2022-01-01
Supplement: d1sm01700d1.pdf [file d1sm01700d1.pdf]

## Supplementary Materials

### Structures of Cationic and Anionic Polyelectrolytes in Aqueous Solutions:

#### The Sign Effect

Chengjiang Lin <sup>ab</sup>, Hao Wei<sup>a</sup>, Hongfei Li<sup>\*ab</sup> and Xiaozheng Duan<sup>\*a</sup>

<sup>a</sup> *State Key Laboratory of Polymer Physics and Chemistry, Changchun Institute of Applied Chemistry, Chinese Academy of Sciences, Changchun, Jilin 130022, China. E-mail:*

*[hfli@ciac.ac.cn](mailto:hfli@ciac.ac.cn), [xzduan@ciac.ac.cn](mailto:xzduan@ciac.ac.cn)*

<sup>b</sup> *School of Applied Chemistry and Engineering, University of Science and Technology of China, Hefei 230026, P. R. China.*

\* Corresponding authors.

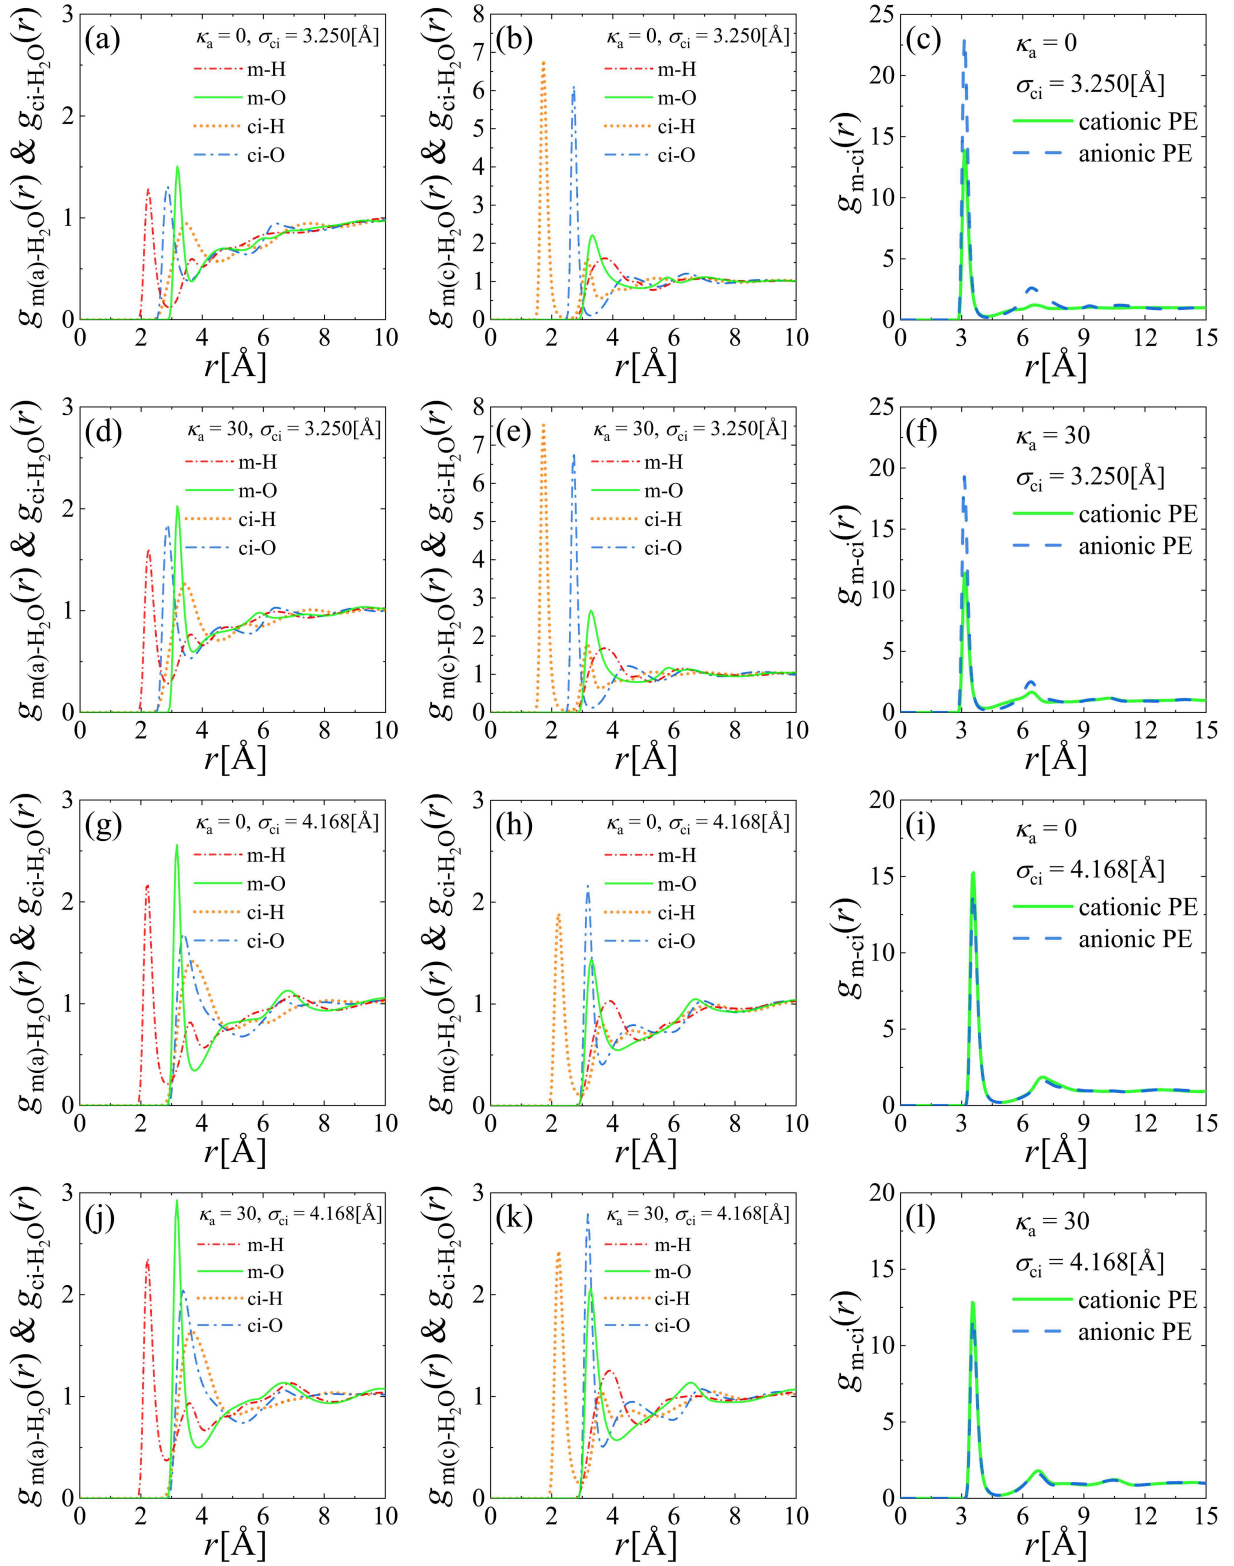

**Fig. S1** Radial distribution functions of O and H in  $\text{H}_2\text{O}$  molecules around each monomer and counterion of (a) anionic and (b) cationic PEs [denoted as  $g_{m(a)-O}(r)$ ,  $g_{m(a)-H}(r)$ ,  $g_{m(c)-O}(r)$ ,  $g_{m(c)-H}(r)$ ,  $g_{ci-O}(r)$ ,  $g_{ci-H}(r)$ ], and counterions around each monomer of single (c) PEs [denoted as  $g_{m(a)-ci}(r)$ ,  $g_{m(c)-ci}(r)$ ] at  $\kappa_a = 0$  and  $\sigma_{ci} = 3.25[\text{\AA}]$ . (d), (e) and (f) correspond to the results of (a), (b) and (c) at  $\kappa_a = 30$  and  $\sigma_{ci} = 3.25[\text{\AA}]$ , respectively. (g), (h) and (i) correspond to the results of (a), (b) and (c) at  $\kappa_a = 0$  and  $\sigma_{ci} = 4.168 [\text{\AA}]$ , respectively. (j), (k) and (l) correspond to the results of (a), (b) and (c) at  $\kappa_a = 30$  and  $\sigma_{ci} = 4.168 [\text{\AA}]$ , respectively.

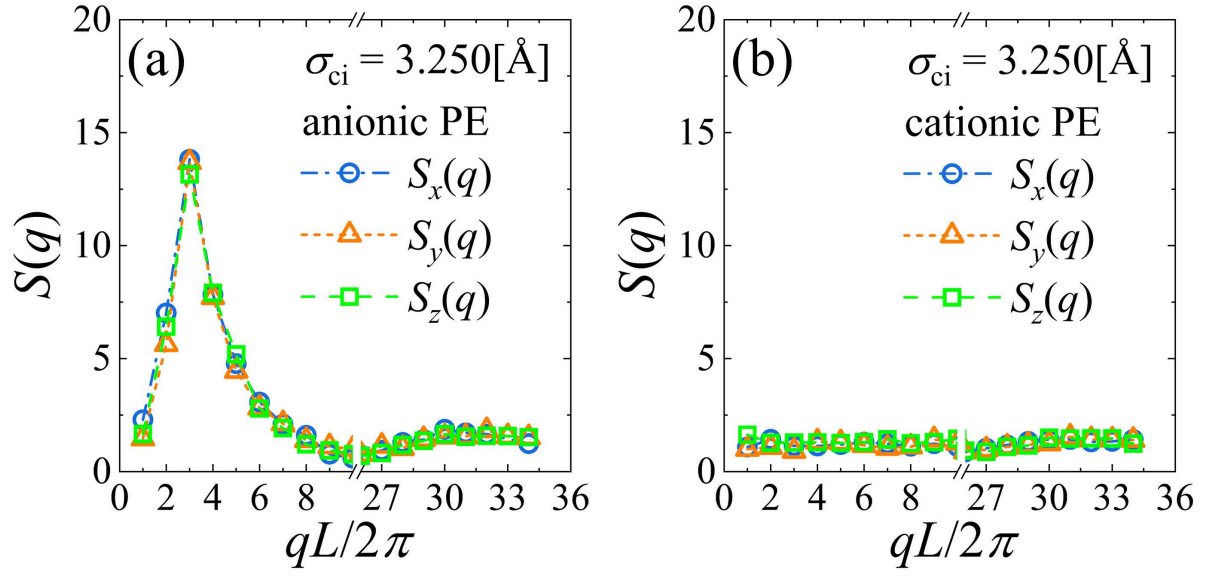

**Fig. S2** Three components of  $S(q)$  in Figure 6(c) along  $x$ ,  $y$ , and  $z$  directions, for (a) anionic polyelectrolytes and counterions, and (b) cationic polyelectrolytes and counterions, at  $\sigma_{ci} = 3.25 [\text{\AA}]$ .
